# Supplementary material for: 2,4-Dinitrobenzenesulfonic acid in an efficient Brønsted acid-catalyzed controlled/living ring-opening polymerization of ε-caprolactone
Source: Royal Society of Chemistry journal article supplement (doi:10.1039/c4ra09579k), 2014-01-01
Supplement: c4ra09579k1.pdf [file c4ra09579k1.pdf]

## Supporting Information

### 2,4-Dinitrobenzenesulfonic Acid as an Efficient Brønsted Acid-Catalyzed Controlled/Living Ring-Opening Polymerization of $\epsilon$ -caprolactone

Huiying Wang, Wenzhuo Wu, Zhenjiang Li,\* Xu Zhi, Cheng Chen, Chengxu Zhao, Xiaopei Li, Qiguo Zhang, Kai Guo\*

State Key Laboratory of Materials-Oriented Chemical Engineering, College of Biotechnology and Pharmaceutical Engineering, Nanjing Tech University, 30 Puzhu Road (S), Nanjing, 211816, China

Fax + 86 25 5813 9935; E-mail: zjli@njtech.edu.cn; guok@njtech.edu.cn

#### Syntheses of End-Functionalized and $\alpha,\omega$ -Dihydroxy Telechelic Poly( $\epsilon$ -caprolactone)

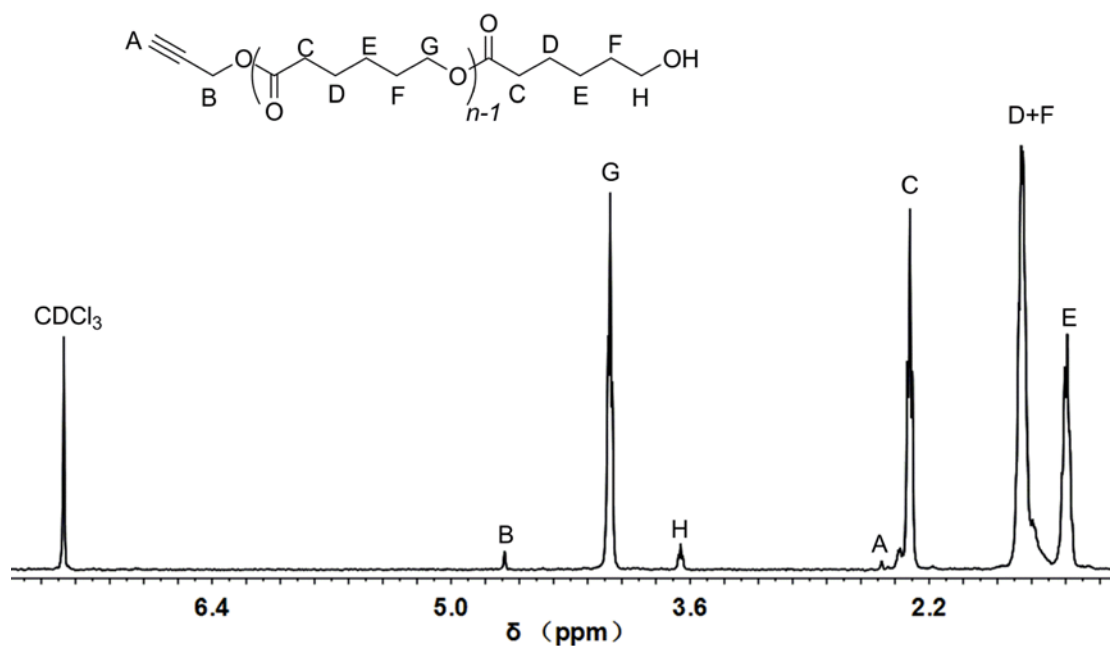

**FIGURE S1**  $^1\text{H}$  NMR spectrum of End-functionalized PCL initiated from propargyl alcohol in  $\text{CDCl}_3$ .

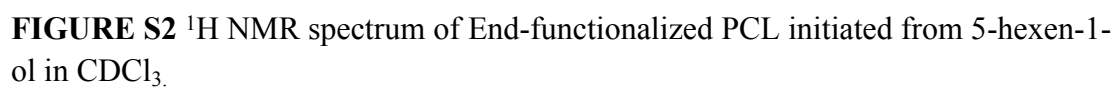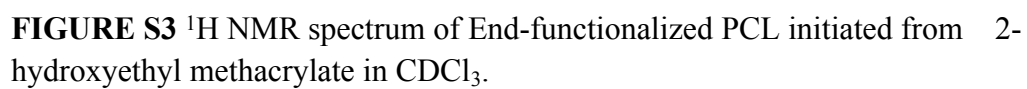

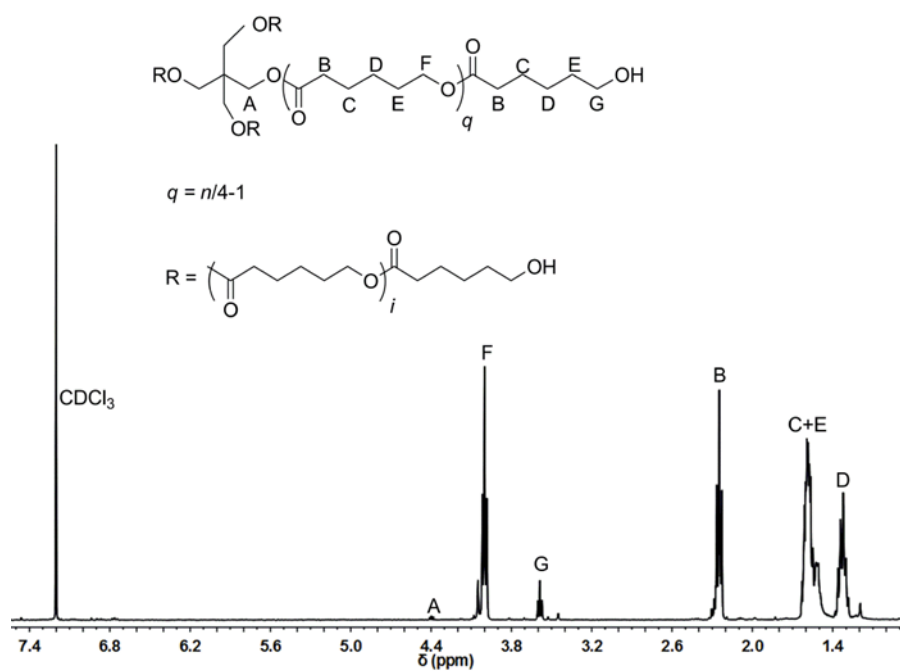

**FIGURE S4**  $^1\text{H NMR}$  spectrum of PCL initiated from Pentaerythritol in  $\text{CDCl}_3$ .

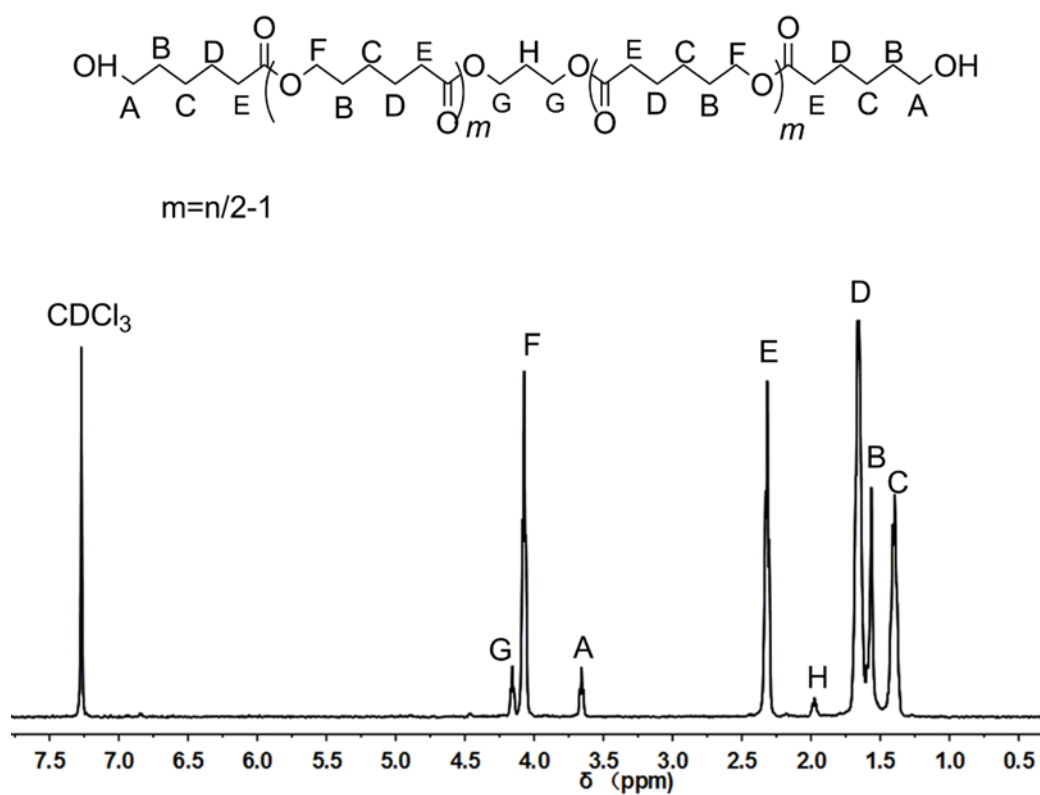

**FIGURE S5**  $^1\text{H NMR}$  spectrum of a, $\omega$ -Dihydroxy Telechelic PCL initiated from 1,3-Propanediol in  $\text{CDCl}_3$ .

**Diblock Copolymers of  $\epsilon$ -Caprolactone and  $\delta$ -Valerolactone, Trimethylene Carbonate.**

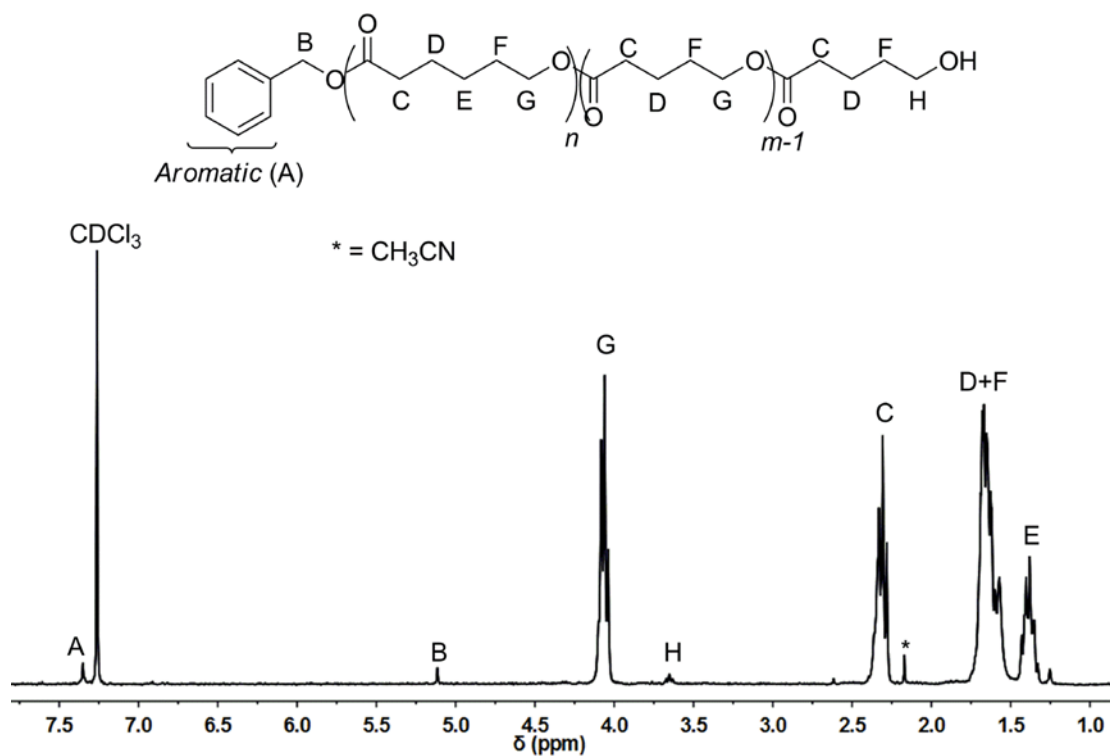

**FIGURE S6**  $^1\text{H}$  NMR spectrum of PCL-*b*-PVL initiated from BnOH in CDCl<sub>3</sub>

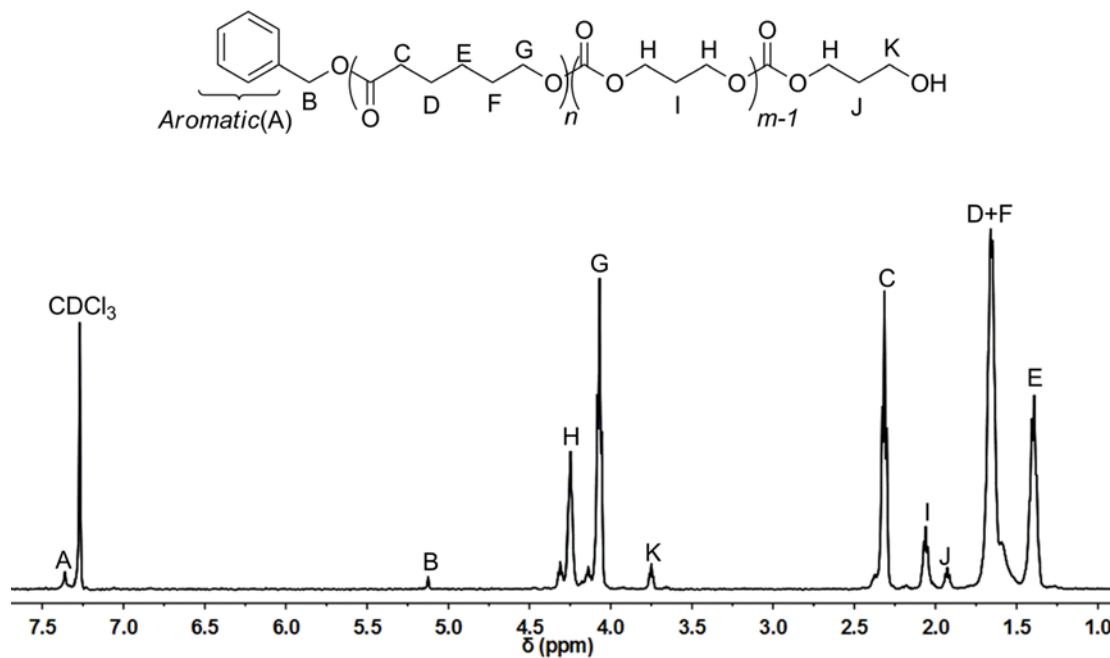

**FIGURE S7**  $^1\text{H}$  NMR spectrum of PCL-*b*-PTMC initiated from BnOH in CDCl<sub>3</sub>.

### **The calculation details of $\epsilon$ -CL conversion**

The calculated conversions of  $\epsilon$ -CL were obtained from  $^1\text{H}$  NMR spectra of reaction mixtures, and the details were as follows: the integral area of the signal of methylene protons at 4.25 ppm of  $\epsilon$ -CL monomer was appointed to 1, and then the integral area of the signal at 4.06 ppm ( $-\text{CH}_2\text{CH}_2\text{O}-$ )<sub>n</sub> was appointed to  $n$ . based on the formula,  $\text{conv.} = n/(n+1) * 100\%$ .
